# Supplementary material
Source: PubMed Central journal article supplement (PMC4424085)
Supplement: NIHMS646618-supplement-supplement_1.pdf [file NIHMS646618-supplement-supplement_1.pdf]

Corey and Colleagues (24)

**Supplementary Table 1. Comparison of lipid measures at baseline and 96 weeks by NASH treatment group (N=247)**

|                                  | Treatment Group        |                      |                      | P                  |                      |
|----------------------------------|------------------------|----------------------|----------------------|--------------------|----------------------|
|                                  | Pioglitazone<br>(N=80) | Vitamin E<br>(N=84)  | Placebo<br>(N=83)    | Pio<br>vs.<br>Plbo | Vit E<br>vs.<br>Plbo |
| <b>Mean (95% CI)</b>             |                        |                      |                      |                    |                      |
| <b>Non HDL-C (mg/dL)</b>         |                        |                      |                      |                    |                      |
| Baseline                         | 150.5 (142.9, 158.0)   | 150.8 (142.1, 159.6) | 155.8 (147.2, 164.3) | 0.36               | 0.42                 |
| 96 weeks                         | 139.5 (132.1, 147.0)   | 139.6 (131.7, 147.5) | 150.8 (140.5, 161.1) | 0.08               | 0.09                 |
| Change from baseline             | -12.5 (-20.7, -4.3)    | -12.6 (-19.4, -5.9)  | -7.7 (-16.6, 1.2)    | 0.43               | 0.37                 |
| <b>Triglycerides (mg/dL)</b>     |                        |                      |                      |                    |                      |
| Baseline                         | 162.5 (143.8, 181.2)   | 166.4 (143.8, 189.0) | 164.8 (145.3, 184.3) | 0.87               | 0.91                 |
| 96 weeks                         | 146.0 (123.4, 168.5)   | 170.3 (147.3, 193.3) | 161.1 (144.7, 177.4) | 0.28               | 0.52                 |
| Change from baseline             | -19.8 (-38.0, -1.6)    | -0.6 (-17.8, 16.7)   | -6.7 (-19.3, 5.8)    | 0.24               | 0.57                 |
| <b>HDL (mg/dL)</b>               |                        |                      |                      |                    |                      |
| Baseline                         | 44.6 (41.8, 47.3)      | 43.8 (41.1, 46.6)    | 43.4 (41.0, 45.8)    | 0.53               | 0.80                 |
| 96 weeks                         | 46.0 (42.8, 49.1)      | 41.9 (38.4, 45.5)    | 41.1 (39.0, 42.3)    | 0.01               | 0.69                 |
| Change from baseline             | 1.1 (-1.4, 3.5)        | -0.9 (-3.3, 1.5)     | -1.9 (-3.8, -0.1)    | 0.05               | 0.51                 |
| <b>LDL (mg/dL)</b>               |                        |                      |                      |                    |                      |
| Baseline                         | 120.0 (113.1, 126.9)   | 119.2 (111.4, 127.0) | 125.3 (117.5, 133.1) | 0.31               | 0.27                 |
| 96 weeks                         | 112.7 (105.9, 119.4)   | 107.7 (100.1, 115.2) | 121.9 (112.9, 131.0) | 0.11               | 0.02                 |
| Change from baseline             | -8.1 (-16.5, 0.3)      | -12.0 (-18.7, -5.4)  | -5.8 (-14.0, 2.4)    | 0.70               | 0.24                 |
| <b>Total cholesterol (mg/dL)</b> |                        |                      |                      |                    |                      |
| Baseline                         | 195.0 (186.8, 203.2)   | 194.7 (185.9, 203.4) | 199.2 (190.3, 208.0) | 0.49               | 0.48                 |
| 96 weeks                         | 185.5 (177.9, 193.1)   | 181.5 (173.2, 189.8) | 191.9 (181.0, 202.8) | 0.35               | 0.13                 |
| Change from baseline             | -11.4 (-20.0, -2.9)    | -13.6 (-20.8, -6.3)  | -9.6 (-19.1, -0.1)   | 0.77               | 0.51                 |
| <b>Triglycerides/HDL</b>         |                        |                      |                      |                    |                      |
| Baseline                         | 4.0 (3.5, 4.6)         | 4.4 (3.6, 5.2)       | 4.1 (3.5, 4.8)       | 0.82               | 0.65                 |
| 96 weeks                         | 3.6 (2.9, 4.4)         | 4.7 (3.9, 5.5)       | 4.1 (3.6, 4.5)       | 0.30               | 0.17                 |

1  
2  
3  
4  
5  
6  
7  
8  
9  
10  
11  
12  
13  
14  
15  
16  
17  
18  
19  
20  
21  
22  
23  
24  
25  
26  
27  
28  
29  
30  
31  
32  
33  
34  
35  
36  
37  
38  
39  
40  
41  
42  
43  
44  
45  
46  
47  
48  
49  
50  
51  
52  
53  
54  
55  
56  
57  
58  
59  
60

|                             |                   |                 |                  |      |      |
|-----------------------------|-------------------|-----------------|------------------|------|------|
| <b>Change from baseline</b> | -0.5 (-1.1, 0.05) | 0.2 (-0.5, 0.8) | -0.1 (-0.5, 0.3) | 0.28 | 0.43 |
|-----------------------------|-------------------|-----------------|------------------|------|------|

For Peer Review

Supplemental Figure 1: Change in weight (kg) vs. change in lipid levels among individuals in the PIVENS trial after 96 weeks

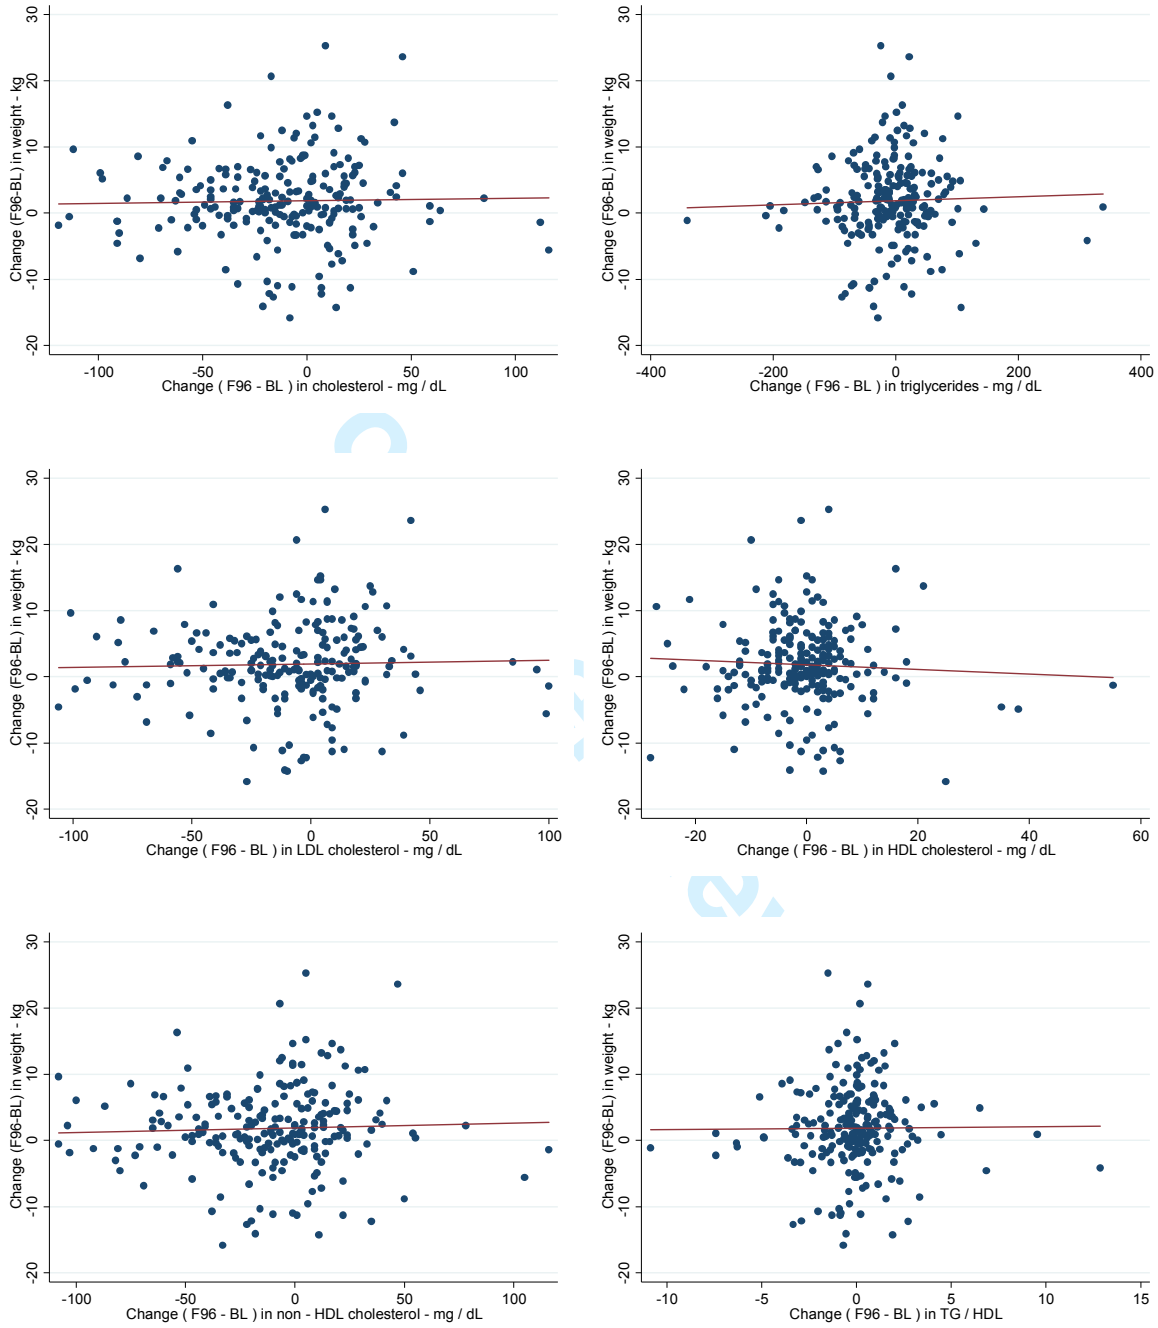

1  
2  
3  
4  
5  
6  
7  
8  
9  
10  
11  
12  
13  
14  
15  
16  
17  
18  
19  
20  
21  
22  
23  
24  
25  
26  
27  
28  
29  
30  
31  
32  
33  
34  
35  
36  
37  
38  
39  
40  
41  
42  
43  
44  
45  
46  
47  
48  
49  
50  
51  
52  
53  
54  
55  
56  
57  
58  
59  
60

Supplemental Figure 2: Change in HOMA-IR vs. change in lipid levels among individuals in the PIVENS trial after 96 weeks

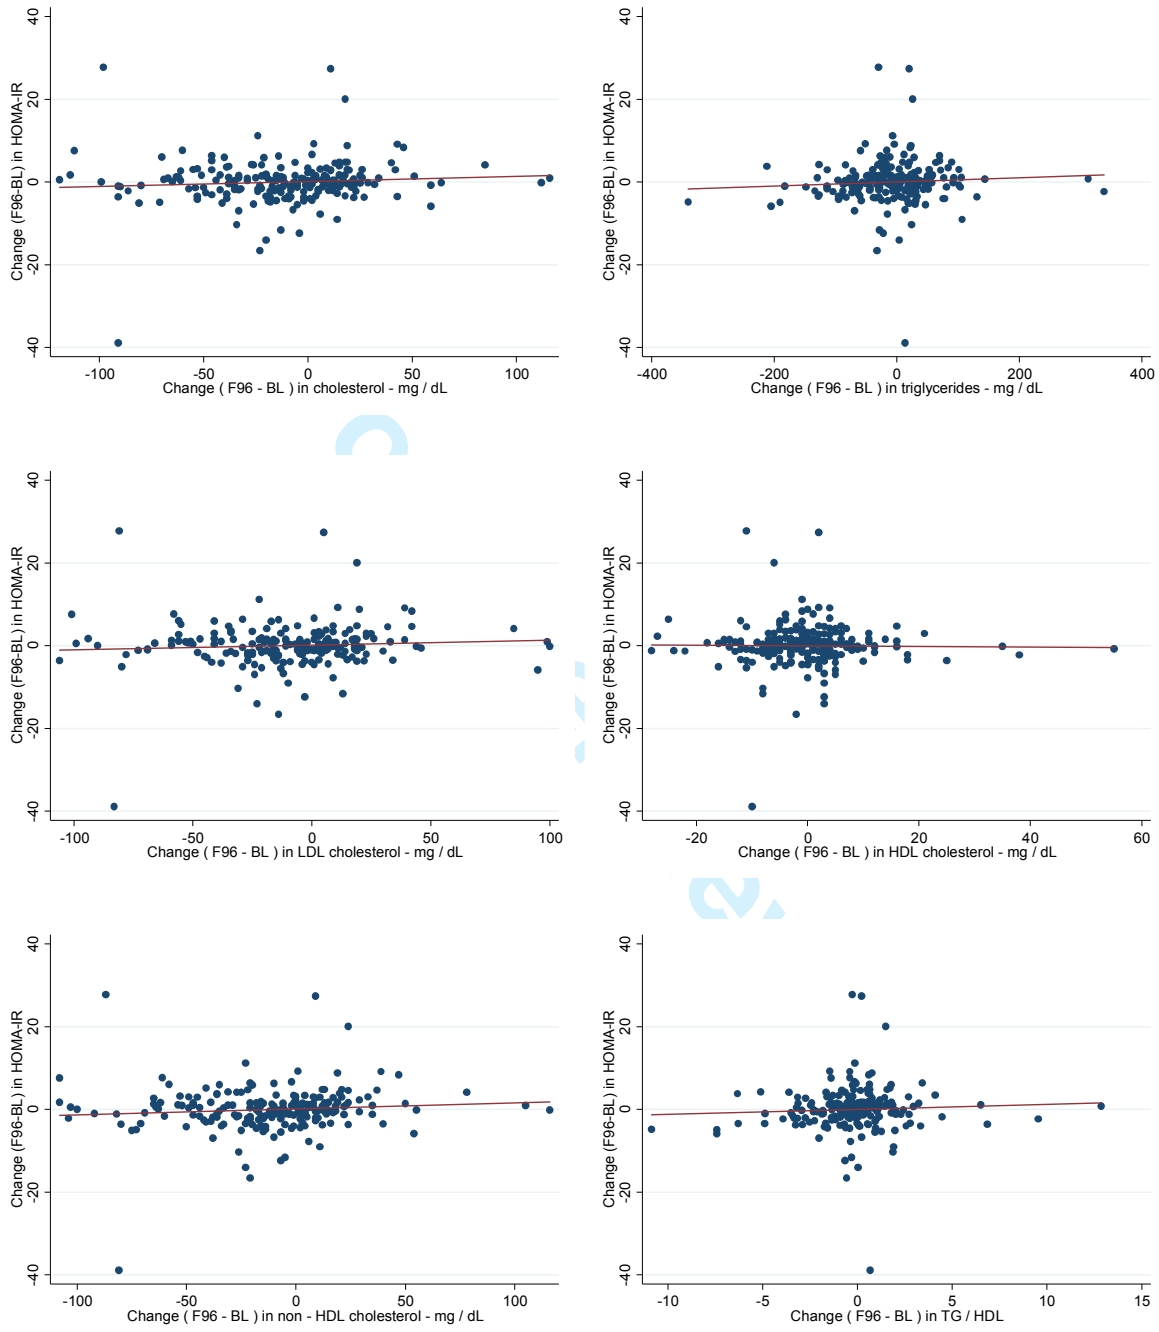

1  
2  
3  
4  
5  
6  
7  
8  
9  
10  
11  
12  
13  
14  
15  
16  
17  
18  
19  
20  
21  
22  
23  
24  
25  
26  
27  
28  
29  
30  
31  
32  
33  
34  
35  
36  
37  
38  
39  
40  
41  
42  
43  
44  
45  
46  
47  
48  
49  
50  
51  
52  
53  
54  
55  
56  
57  
58  
59  
60
